# Supplementary material for: Comparative Efficacy of Tocilizumab and Baricitinib Administration in COVID-19 Treatment: A Retrospective Cohort Study
Source: MDPI journal article supplement (doi:10.3390/medicina58040513), 2022-04-04
Supplement: s1 [file s1]

**Table S1. Predicting risk factors for infection event within 28 days of treatment with tocilizumab or baricitinib.**

|                                                | univariate<br>OR (95%CI) | <i>P</i> -value |
|------------------------------------------------|--------------------------|-----------------|
| Characteristics                                |                          |                 |
| Baricitinib use                                | 0.93 (0.29-2.98)         | 0.904           |
| Age (year)                                     | 1.03 (0.98-1.08)         | 0.208           |
| Sex(male)                                      | 0.63 (0.19-2.08)         | 0.453           |
| Current smoker                                 | 0.75 (0.15-3.74)         | 0.728           |
| BMI $\geq 30$ (kg/m <sup>2</sup> )             | 0.69 (0.18-2.73)         | 0.694           |
| Chronic heart disease                          | 2.96 (0.86-10.18)        | 0.085           |
| Diabetes mellitus                              | 0.83 (0.26-2.68)         | 0.767           |
| Hypertension                                   | 2.61 (0.82-8.31)         | 0.104           |
| Time from onset to administration $\leq 7$ day | 2.43 (0.79-7.48)         | 0.123           |
| Treatment                                      |                          |                 |
| Heparin                                        | 0.66 (0.18-2.33)         | 0.657           |
| Any anti-viral drug                            | 0.55 (0.17-1.83)         | 0.332           |
| Blood test at administration                   |                          |                 |
| Lymphocytes ( $\times 10^3/\mu\text{L}$ )      | 0.97 (0.82-1.15)         | 0.747           |
| Platelet ( $\times 10^5/\mu\text{L}$ )         | 0.88 (0.50-1.56)         | 0.672           |
| LDH ( $\times 10^2\text{U/L}$ )                | 1.10(0.82-1.49)          | 0.498           |
| CRP (mg/mL)                                    | 1.00 (0.90-1.10)         | 0.897           |
| KL-6 ( $\times 10^2\text{U/mL}$ )              | 1.08 (0.91-1.29)         | 0.373           |
| Procalcitonin (ng/mL)                          | 1.22 (0.17-8.46)         | 0.844           |
| Ferritin (ng/mL)                               | 1.11 (0.65-1.88)         | 0.706           |
| D-dimer ( $\mu\text{g/mL}$ )                   | 1.02 (1.00-1.04)         | 0.060           |

BMI, body mass index; CI, Confidence interval; CRP, C-reactive protein; KL-6, Krebs von den Lungen-6; LDH, lactate

dehydrogenase; OR, odds ratio.
