# Supplementary material for: Comparative Efficacy of Tocilizumab and Baricitinib Administration in COVID-19 Treatment: A Retrospective Cohort Study
Source: MDPI journal article supplement (doi:10.3390/medicina58040513), 2022-04-04
Supplement: s1 [file s1]

**Table S2. Comparison between baseline characteristics of tocilizumab and baricitinib groups (after propensity score matcing).**

|                                                  | Tocilizumab (n=25) | Baricitinib (n=25) | P-value |
|--------------------------------------------------|--------------------|--------------------|---------|
| Characteristics                                  |                    |                    |         |
| Age (year)                                       | 60 (54, 66)        | 59 (53, 66)        | 0.75    |
| Sex (male)                                       | 17 (68.0)          | 20 (80.0)          | 0.33    |
| Current smoker                                   | 7 (28.0)           | 4 (16.0)           | 0.31    |
| BMI $\geq$ 30 (kg/m <sup>2</sup> )               | 9 (36.0)           | 6 (25.0)           | 0.40    |
| Chronic heart disease                            | 5 (20.0)           | 1 (4.0)            | 0.082   |
| Chronic kidney disease                           | 0 (0)              | 2 (8.0)            | 0.15    |
| Diabetes mellitus                                | 10 (40.0)          | 10 (40.0)          | 1.00    |
| Any collagen disease                             | 1 (4.0)            | 0 (0)              | 0.31    |
| Hypertension                                     | 12 (48.0)          | 9 (42.9)           | 0.39    |
| Any respiratory disease                          | 1 (4.0)            | 2 (8.0)            | 0.55    |
| Immunosuppressive drug regular use               | 0 (0)              | 1 (2.0)            | 0.31    |
| Vaccination twice                                | 0 (0)              | 1 (2.0)            | 0.31    |
| Time from symptom onset to administration        | 9 (8, 13)          | 9 (7, 11)          | 0.39    |
| Time from onset to administration $\leq$ 7day    | 8 (32.0)           | 6 (24.0)           | 0.53    |
| Treatment                                        |                    |                    |         |
| Steroid                                          | 25 (100)           | 25 (100)           | N/A     |
| Heparin                                          | 21(84.0)           | 15 (60.0)          | 0.059   |
| Any anti-viral drug                              | 22 (88.0)          | 21 (84.0)          | 0.68    |
| Antibody combination<br>casirivimab/imdevimab    | 0 (0)              | 1 (1.0)            | 0.144   |
| Severity                                         |                    |                    |         |
| 1                                                | 0 (0)              | 0 (0)              |         |
| 2                                                | 2 (8.0)            | 5 (20.0)           |         |
| 3                                                | 18 (72.0)          | 19 (76.0)          |         |
| 4                                                | 5 (20.0)           | 1 (4.0)            | 0.137   |
| Outcomes                                         |                    |                    |         |
| Death within 28 days                             | 2 (8.0)            | 1 (4.0)            | 0.55    |
| Improvement in respiratory status within 28 days | 21 (84.0)          | 22 (88.0)          | 0.68    |
| Development of secondary infections              | 3 (12.0)           | 4 (16.0)           | 0.68    |

Data are shown as median (interquartile range) or number (%).

We categorized COVID-19 severity at treatment initiation as follows; severity level 1: hospitalized but not requiring supplemental oxygen; severity level 2: hospitalized and requiring supplemental oxygen  $\leq$  4 L/min; severity level 3: hospitalized and requiring oxygen therapy  $\geq$  5 L/min or re-ceiving nasal high-flow oxygen therapy, non-rebreather, or noninvasive mechanical ventilation; and severity level 4, receiving invasive mechanical ventilation.

BMI, body mass index; CRP, C-reactive protein; KL-6, Krebs von den Lungen-6; LDH, lactate dehydrogenase.
